# Supplementary material for: Rapidly discriminate commercial medicinal Pulsatilla chinensis (Bge.) Regel from its adulterants using ITS2 barcoding and specific PCR-RFLP assay
Source: PubMed Central journal article supplement (PMC5216359; doi:10.1038/srep40000), 2017-01-06
Supplement: srep40000-s1.pdf [file srep40000-s1.pdf]

**Rapidly discriminate commercial medicinal *Pulsatilla chinensis*  
(Bge.) Regel from its adulterants using ITS2 barcoding and specific  
PCR-RFLP assay**

Yuhua Shi, Mingming Zhao, Hui Yao, Pei Yang, Tianyi Xin, Bin Li, Wei Sun\*, Shilin Chen\*

## Supplementary Information

**Supplementary Table S1** Information of voucher samples used in the study

| Species                     | Family        | Sample ID | Voucher number | Collected part | Collected place     | GenBank accession |
|-----------------------------|---------------|-----------|----------------|----------------|---------------------|-------------------|
| <i>Pulsatilla chinensis</i> | Ranunculaceae | B1        | PS0899B1       | leaf           | Nanyang, Henan      | KR611721          |
| <i>Pu. chinensis</i>        | Ranunculaceae | B2        | PS0899B2       | leaf           | Nanyang, Henan      | KR611722          |
| <i>Pu. chinensis</i>        | Ranunculaceae | B3        | PS0899B3       | leaf           | Nanyang, Henan      | KR611723          |
| <i>Pu. chinensis</i>        | Ranunculaceae | B4        | PS0899B4       | leaf           | Nanyang, Henan      | KR611724          |
| <i>Pu. chinensis</i>        | Ranunculaceae | B5        | PS0899B5       | leaf           | Nanyang, Henan      | KR611725          |
| <i>Pu. chinensis</i>        | Ranunculaceae | B6        | PS0899B6       | leaf           | Nanyang, Henan      | KR611726          |
| <i>Pu. chinensis</i>        | Ranunculaceae | B7        | PS0899B7       | root           | Nanyang, Henan      | KR611727          |
| <i>Pu. chinensis</i>        | Ranunculaceae | B8        | PS0899B8       | root           | Nanyang, Henan      | KR611728          |
| <i>Pu. chinensis</i>        | Ranunculaceae | B9        | PS0899B9       | root           | Nanyang, Henan      | KR611729          |
| <i>Pu. chinensis</i>        | Ranunculaceae | B10       | PS0899B10      | root           | Nanyang, Henan      | KR611730          |
| <i>Pu. chinensis</i>        | Ranunculaceae | B11       | PS0899B11      | leaf           | Xi'an, Shaanxi      | KR611731          |
| <i>Pu. chinensis</i>        | Ranunculaceae | B12       | PS0899B12      | leaf           | Xi'an, Shaanxi      | KR611732          |
| <i>Pu. chinensis</i>        | Ranunculaceae | B13       | PS0899B13      | leaf           | Xi'an, Shaanxi      | KR611733          |
| <i>Pu. chinensis</i>        | Ranunculaceae | B14       | PS0899B14      | leaf           | Shengnongjia, Hubei | KR611734          |
| <i>Pu. chinensis</i>        | Ranunculaceae | B15       | PS0899B15      | leaf           | Shengnongjia, Hubei | KR611735          |
| <i>Pu. chinensis</i>        | Ranunculaceae | B16       | PS0899B16      | leaf           | Shengnongjia, Hubei | KR611736          |
| <i>Pu. chinensis</i>        | Ranunculaceae | B17       | PS0899B17      | leaf           | Baihuashan, Beijing | KR611737          |
| <i>Pu. chinensis</i>        | Ranunculaceae | B18       | PS0899B18      | leaf           | Baihuashan, Beijing | KR611738          |
| <i>Pu. chinensis</i>        | Ranunculaceae | B19       | PS0899B19      | leaf           | Baihuashan, Beijing | KR611739          |
| <i>Pu. chinensis</i>        | Ranunculaceae | B20       | PS0899B20      | leaf           | Changbaishan, Jilin | KR611740          |
| <i>Pu. chinensis</i>        | Ranunculaceae | B21       | PS0899B21      | leaf           | Changbaishan, Jilin | KR611741          |
| <i>Pu. chinensis</i>        | Ranunculaceae | B22       | PS0899B22      | leaf           | Changbaishan, Jilin | KR611742          |
| <i>Pu. chinensis</i>        | Ranunculaceae | B23       | PS0899B23      | leaf           | Beijing             | KR611743          |
| <i>Pu. chinensis</i>        | Ranunculaceae | B24       | PS0899B24      | leaf           | Beijing             | KR611744          |
| <i>Pu. chinensis</i>        | Ranunculaceae | B25       | PS0899B25      | leaf           | Beijing             | KR611745          |
| <i>Pu. cernua</i>           | Ranunculaceae | C1        | PS3102C1       | leaf           | Dandong, Liaoning   | KT969417          |
| <i>Pu. cernua</i>           | Ranunculaceae | C2        | PS3102C2       | leaf           | Dandong, Liaoning   | KT969418          |
| <i>Pu. cernua</i>           | Ranunculaceae | C3        | PS3102C3       | leaf           | Dandong, Liaoning   | KT969419          |
| <i>Pu. cernua</i>           | Ranunculaceae | C4        | PS3102C4       | leaf           | Dandong, Liaoning   | KT969420          |
| <i>Pu. cernua</i>           | Ranunculaceae | C5        | PS3102C5       | leaf           | Dandong, Liaoning   | KT969421          |
| <i>Pu. cernua</i>           | Ranunculaceae | C6        | PS3102C6       | leaf           | Dandong, Liaoning   | KT969422          |
| <i>Pu. cernua</i>           | Ranunculaceae | —         | —              | —              | GenBank             | HQ829820          |
| <i>Pu. cernua</i>           | Ranunculaceae | —         | —              | —              | GenBank             | JN811070          |
| <i>Pu. cernua</i>           | Ranunculaceae | —         | —              | —              | GenBank             | JN811071          |
| <i>Pu. campanella</i>       | Ranunculaceae | Z1        | PS3103Z1       | leaf           | Wulumuqi, Xinjiang  | KT969423          |
| <i>Pu. campanella</i>       | Ranunculaceae | Z2        | PS3103Z2       | leaf           | Wulumuqi, Xinjiang  | KT969424          |
| <i>Pu. campanella</i>       | Ranunculaceae | Z3        | PS3103Z3       | leaf           | Wulumuqi, Xinjiang  | KT969425          |
| <i>Pu. campanella</i>       | Ranunculaceae | Z4        | PS3103Z4       | leaf           | Wulumuqi, Xinjiang  | KT969426          |

|                              |               |     |           |      |                     |          |
|------------------------------|---------------|-----|-----------|------|---------------------|----------|
| <i>Pu. campanella</i>        | Ranunculaceae | Z5  | PS3103Z5  | leaf | Wulumuqi, Xinjiang  | KT969427 |
| <i>Pu. campanella</i>        | Ranunculaceae | Z6  | PS3103Z6  | leaf | Wulumuqi, Xinjiang  | KT969428 |
| <i>Pu. campanella</i>        | Ranunculaceae | Z7  | PS3103Z7  | leaf | Wulumuqi, Xinjiang  | KT969429 |
| <i>Pu. campanella</i>        | Ranunculaceae | Z8  | PS3103Z8  | leaf | Wulumuqi, Xinjiang  | KT969430 |
| <i>Pu. millefolium</i>       | Ranunculaceae | X1  | PS3104X1  | leaf | Yunnan              | KT969431 |
| <i>Pu. tongkanensis</i>      | Ranunculaceae | —   | —         | —    | GenBank             | JN811072 |
| <i>Pu. tongkanensis</i>      | Ranunculaceae | —   | —         | —    | GenBank             | JN811073 |
| <i>Pu. tongkanensis</i>      | Ranunculaceae | —   | —         | —    | GenBank             | JN811074 |
| <i>Pu. tongkanensis</i>      | Ranunculaceae | —   | —         | —    | GenBank             | JN811075 |
| <i>Pu. violacea</i>          | Ranunculaceae | —   | —         | —    | GenBank             | JF422892 |
| <i>Pu. violacea</i>          | Ranunculaceae | —   | —         | —    | GenBank             | JF422893 |
| <i>Pu. violacea</i>          | Ranunculaceae | —   | —         | —    | GenBank             | JF422894 |
| <i>Pu. albana</i>            | Ranunculaceae | —   | —         | —    | GenBank             | JF422890 |
| <i>Pu. dahurica</i>          | Ranunculaceae | —   | —         | —    | GenBank             | HQ735289 |
| <i>Pu. dahurica</i>          | Ranunculaceae | —   | —         | —    | GenBank             | GU732648 |
| <i>Pu. halleri</i>           | Ranunculaceae | —   | —         | —    | GenBank             | FJ639908 |
| <i>Pu. rubra</i>             | Ranunculaceae | —   | —         | —    | GenBank             | JF422891 |
| <i>Pu. sp.</i>               | Ranunculaceae | —   | —         | —    | GenBank             | GU732651 |
| <i>Pu. turczaninovii</i>     | Ranunculaceae | —   | —         | —    | GenBank             | GU732649 |
| <i>Potentilla chinensis</i>  | Rosaceae      | W1  | PS1120W1  | leaf | Shengnongjia, Hubei | KR611746 |
| <i>Po. chinensis</i>         | Rosaceae      | W2  | PS1120W2  | leaf | Shengnongjia, Hubei | KR611747 |
| <i>Po. chinensis</i>         | Rosaceae      | W3  | PS1120W3  | leaf | Shengnongjia, Hubei | KR611748 |
| <i>Po. chinensis</i>         | Rosaceae      | W4  | PS1120W4  | leaf | Chongqing           | KR611749 |
| <i>Po. chinensis</i>         | Rosaceae      | W5  | PS1120W5  | leaf | Chongqing           | KR611750 |
| <i>Po. chinensis</i>         | Rosaceae      | W6  | PS1120W6  | leaf | Wuhan, Hubei        | KR611751 |
| <i>Po. chinensis</i>         | Rosaceae      | W7  | PS1120W7  | leaf | Wuhan, Hubei        | KR611752 |
| <i>Po. chinensis</i>         | Rosaceae      | W8  | PS1120W8  | leaf | Wuhan, Hubei        | KR611753 |
| <i>Po. chinensis</i>         | Rosaceae      | W9  | PS1120W9  | leaf | Beijing             | KR611754 |
| <i>Po. chinensis</i>         | Rosaceae      | W10 | PS1120W10 | leaf | Beijing             | KR611755 |
| <i>Po. discolor</i>          | Rosaceae      | F1  | PS1079F1  | leaf | Beijing             | KR611766 |
| <i>Po. discolor</i>          | Rosaceae      | F2  | PS1079F2  | leaf | Beijing             | KR611767 |
| <i>Po. discolor</i>          | Rosaceae      | F3  | PS1079F3  | leaf | Nanning, Guangxi    | KR611768 |
| <i>Po. discolor</i>          | Rosaceae      | F4  | PS1079F4  | leaf | Nanning, Guangxi    | KR611769 |
| <i>Po. discolor</i>          | Rosaceae      | F5  | PS1079F5  | leaf | Nanning, Guangxi    | KR611770 |
| <i>Po. discolor</i>          | Rosaceae      | F6  | PS1079F6  | leaf | Nanning, Guangxi    | KR611771 |
| <i>Po. discolor</i>          | Rosaceae      | F7  | PS1079F7  | leaf | Nanning, Guangxi    | KR611772 |
| <i>Po. discolor</i>          | Rosaceae      | F8  | PS1079F8  | leaf | Anhui               | KR611773 |
| <i>Rhaponticum uniflorum</i> | Compositae    | L1  | PS0674L1  | leaf | Nanyang, Henan      | KR611756 |
| <i>R. uniflorum</i>          | Compositae    | L2  | PS0674L2  | root | Beijing             | KR611757 |
| <i>R. uniflorum</i>          | Compositae    | L3  | PS0674L3  | root | Beijing             | KR611758 |
| <i>R. uniflorum</i>          | Compositae    | L4  | PS0674L4  | leaf | Beijing             | KR611759 |
| <i>R. uniflorum</i>          | Compositae    | L5  | PS0674L5  | leaf | Songshan, Henan     | KR611760 |
| <i>R. uniflorum</i>          | Compositae    | L6  | PS0674L6  | leaf | Songshan, Henan     | KR611761 |
| <i>R. uniflorum</i>          | Compositae    | L7  | PS0674L7  | leaf | Songshan, Henan     | KR611762 |

|                                               |               |     |            |      |                          |          |
|-----------------------------------------------|---------------|-----|------------|------|--------------------------|----------|
| <i>R. uniflorum</i>                           | Compositae    | L8  | PS0674L8   | leaf | Changbaishan, Jilin      | KR611763 |
| <i>R. uniflorum</i>                           | Compositae    | L9  | PS0674L9   | leaf | Changbaishan, Jilin      | KR611764 |
| <i>R. uniflorum</i>                           | Compositae    | L10 | PS0674L10  | leaf | Changbaishan, Jilin      | KR611765 |
| <i>Platycodon grandiflorus</i>                | Campanulaceae | J1  | PS0583J1   | leaf | Qingdao, Shandong        | KR611774 |
| <i>P. grandiflorus</i>                        | Campanulaceae | J2  | PS0583J2   | leaf | Qingdao, Shandong        | KR611775 |
| <i>P. grandiflorus</i>                        | Campanulaceae | J3  | PS0583J3   | leaf | Chongqing                | KR611776 |
| <i>P. grandiflorus</i>                        | Campanulaceae | J4  | PS0583J4   | leaf | Chongqing                | KR611777 |
| <i>P. grandiflorus</i>                        | Campanulaceae | J5  | PS0583J5   | leaf | Chongqing                | KR611778 |
| <i>P. grandiflorus</i>                        | Campanulaceae | J6  | PS0583J6   | leaf | Chongqing                | KR611779 |
| <i>Ajuga decumbens</i>                        | Labiatae      | JC1 | PS1738JC1  | leaf | Anhui                    | KR611783 |
| <i>A. decumbens</i>                           | Labiatae      | JC2 | PS1738JC2  | leaf | Anhui                    | KR611784 |
| <i>A. decumbens</i>                           | Labiatae      | JC3 | PS1738JC3  | leaf | Chongqing                | KR611785 |
| <i>A. decumbens</i>                           | Labiatae      | JC4 | PS1738JC4  | leaf | Yunnan                   | KR611786 |
| <i>Anemone hupehensis</i>                     | Ranunculaceae | D1  | PS3105D1   | leaf | Shengnongjia, Hubei      | KR611780 |
| <i>A. hupehensis</i>                          | Ranunculaceae | D2  | PS3105D2   | leaf | Shengnongjia, Hubei      | KR611781 |
| <i>A. hupehensis</i>                          | Ranunculaceae | D3  | PS3105D3   | leaf | Shengnongjia, Hubei      | KR611782 |
| <i>A. hupehensis</i>                          | Ranunculaceae |     | —          | —    | GenBank                  | HQ440207 |
| <i>Leontopodium</i><br><i>leontopodioides</i> | Compositae    |     | PS0634MT01 | leaf | Donglingshan,<br>Beijing | FJ980329 |
| <i>L. leontopodioides</i>                     | Compositae    |     | —          | —    | GenBank                  | FJ639944 |
| <i>Duhaldea cappa</i>                         | Compositae    |     | PS0701MT01 | leaf | Kunming, Yunnan          | FJ980352 |
| <i>D. cappa</i>                               | Compositae    |     | —          | —    | GenBank                  | KP092567 |
| <i>Gerbera piloselloides</i>                  | Compositae    |     | —          | —    | GenBank                  | GU126788 |
| <i>Gnaphalium affine</i>                      | Compositae    |     | PS0684MT01 | leaf | Putian, Fujian           | FJ980346 |

**Supplementary Table S2** Intraspecific distances of species in the ITS2 database of *Pulsatilla chinensis* and its adulterants

| Specie                              | Sample number | Intraspecific ITS2 distances (KP2) |         |       |
|-------------------------------------|---------------|------------------------------------|---------|-------|
|                                     |               | Minimum                            | Maximum | Mean  |
| <i>Pulsatilla chinensis</i>         | 25            | 0                                  | 0.019   | 0.006 |
| <i>Pu. cernua</i>                   | 9             | 0                                  | 0.005   | 0.002 |
| <i>Pu. campanella</i>               | 9             | 0                                  | 0.029   | 0.012 |
| <i>Pu. millefolium</i>              | 1             | —                                  | —       | —     |
| <i>Pu. tongkanensis</i>             | 4             | 0                                  | 0       | 0     |
| <i>Pu. violacea</i>                 | 3             | 0.005                              | 0.014   | 0.010 |
| <i>Pu. dahurica</i>                 | 2             | 0.029                              | 0.029   | 0.029 |
| <i>Pu. albana</i>                   | 1             | —                                  | —       | —     |
| <i>Pu. halleri</i>                  | 1             | —                                  | —       | —     |
| <i>Pu. rubra</i>                    | 1             | —                                  | —       | —     |
| <i>Pu. sp.</i>                      | 1             | —                                  | —       | —     |
| <i>Pu. turczaninovii</i>            | 1             | —                                  | —       | —     |
| <i>Potentilla chinensis</i>         | 10            | 0                                  | 0.078   | 0.046 |
| <i>Po. discolor</i>                 | 8             | 0                                  | 0.015   | 0.005 |
| <i>Rhaponticum uniflorum</i>        | 10            | 0                                  | 0.014   | 0.007 |
| <i>Platycodon grandiflorus</i>      | 6             | 0                                  | 0       | 0     |
| <i>Anemone hupehensis</i>           | 4             | 0                                  | 0.010   | 0.004 |
| <i>Ajuga decumbens</i>              | 4             | 0                                  | 0.005   | 0.002 |
| <i>Leontopodium leontopodioides</i> | 2             | 0                                  | 0       | 0     |
| <i>Duhaldea cappa</i>               | 2             | 0                                  | 0       | 0     |
| <i>Gerbera piloselloides</i>        | 1             | —                                  | —       | —     |
| <i>Gnaphalium affine</i>            | 1             | —                                  | —       | —     |

|                              |     |                                                              |
|------------------------------|-----|--------------------------------------------------------------|
| Pulsatilla_chinensis_H1 (15) | 1   | CACACAGCGTCGCCCCACCAAAGCATTGGATGGGGGCGGAAATTGGCCCCCGAGCCC    |
| Pulsatilla_chinensis_H2 (5)  | 1   | CACACAGCGTCGCCCCACCAAAGCATTGGATGGGGGCGGAAATTGGCCCCCGAGCCC    |
| Pulsatilla_chinensis_H3 (3)  | 1   | CACACAGCGTCGCCCCACCAAAGCATTGGATGGGGGCGGAAATTGGCCCCCGAGCCC    |
| Pulsatilla_chinensis_H4 (1)  | 1   | CACACAGCGTCGCCCCACCAAAGCATTGGATGGGGGCGGAAATTGGCCCCCGAGCCC    |
| Pulsatilla_chinensis_H5 (1)  | 1   | CACACAGCGTCGCCCCACCAAAGCATTGGATGGGGGCGGAAATTGGCCCCCGAGCCC    |
|                              |     |                                                              |
| Pulsatilla_chinensis_H1 (15) | 61  | CCCGGGCACGGTCGGCACAAATGTTGGCCCTCGGCGGCGAGCGTCGCGGTCAGCGGTGGT |
| Pulsatilla_chinensis_H2 (5)  | 61  | CCYGGGCACGGTCGGCACAAATGTTGGCCCTCGGCGGCGAGCGTCGCGGTCAGCGGTGGT |
| Pulsatilla_chinensis_H3 (3)  | 61  | CCTGGGCACGGTCGGCACAAATGTTGGCCCTCGGCGGCGAGCGTCGCGGTCAGCGGTGGT |
| Pulsatilla_chinensis_H4 (1)  | 61  | CCTGGGCACGGTCGGCACAAATGTTGGCCCTCGGCGGCGAGCGTCGCGGTCAGCGGTGGT |
| Pulsatilla_chinensis_H5 (1)  | 61  | CCTGGGCACGGTCGGCACAAATGTTGGCCCTCGGCGGCGAGCGTCGCGGTCAGCGGTGGT |
|                              |     |                                                              |
| Pulsatilla_chinensis_H1 (15) | 121 | TGTACTCTCATCCTCCAAAGACAAAATGACGCGTCCGCCTCGTCGCCCGCTGGGCGAAGA |
| Pulsatilla_chinensis_H2 (5)  | 121 | TGTACTCTCATCCTCCAAAGACAAAATGACGCGTCCGCCTCGTCGCCCGCTGGGCGAAGA |
| Pulsatilla_chinensis_H3 (3)  | 121 | TGTACTCTCATCCTCCAAAGACAAAATGACGCGTCCGCCTCGTCGCCCGCTGGGCGAAGA |
| Pulsatilla_chinensis_H4 (1)  | 121 | TGTACTCTCATCCTCCAAAGACAAAATGACGCGTCCGCCTCGTCGCCCGCTGGGCGAAGA |
| Pulsatilla_chinensis_H5 (1)  | 121 | TGTACTCTCATCCTCCAAAGACAAAATGACGCGTCCGCCTCGTCGCCCGCTGGGCGAAGA |
|                              |     |                                                              |
| Pulsatilla_chinensis_H1 (15) | 181 | TGACCCAAGGAGTCTCCCAACCGGAGACTT                               |
| Pulsatilla_chinensis_H2 (5)  | 181 | TGACCCAAGGAGTCTCCCAACCGGAGACTT                               |
| Pulsatilla_chinensis_H3 (3)  | 181 | TGACCCAAGGAGTCTCCCAACCGGAGACTT                               |
| Pulsatilla_chinensis_H4 (1)  | 181 | TGACCCAAGGAGTCTCCCAACCGGAGACTT                               |
| Pulsatilla_chinensis_H5 (1)  | 181 | TGACCCAAGGAGTCTCCCAACCGGAGACTT                               |

**Supplementary Figure S1** Intragenomic variation in the ITS2 sequences of *Pulsatilla chinensis*. The figure was performed by ClustalW-BOXSHADE alignment method. Each digit in the bracket represents the number of the ITS2 haplotype; black shade indicates identical base; gray or white shade indicates variable base; Y represents T/C; S represents C/G.

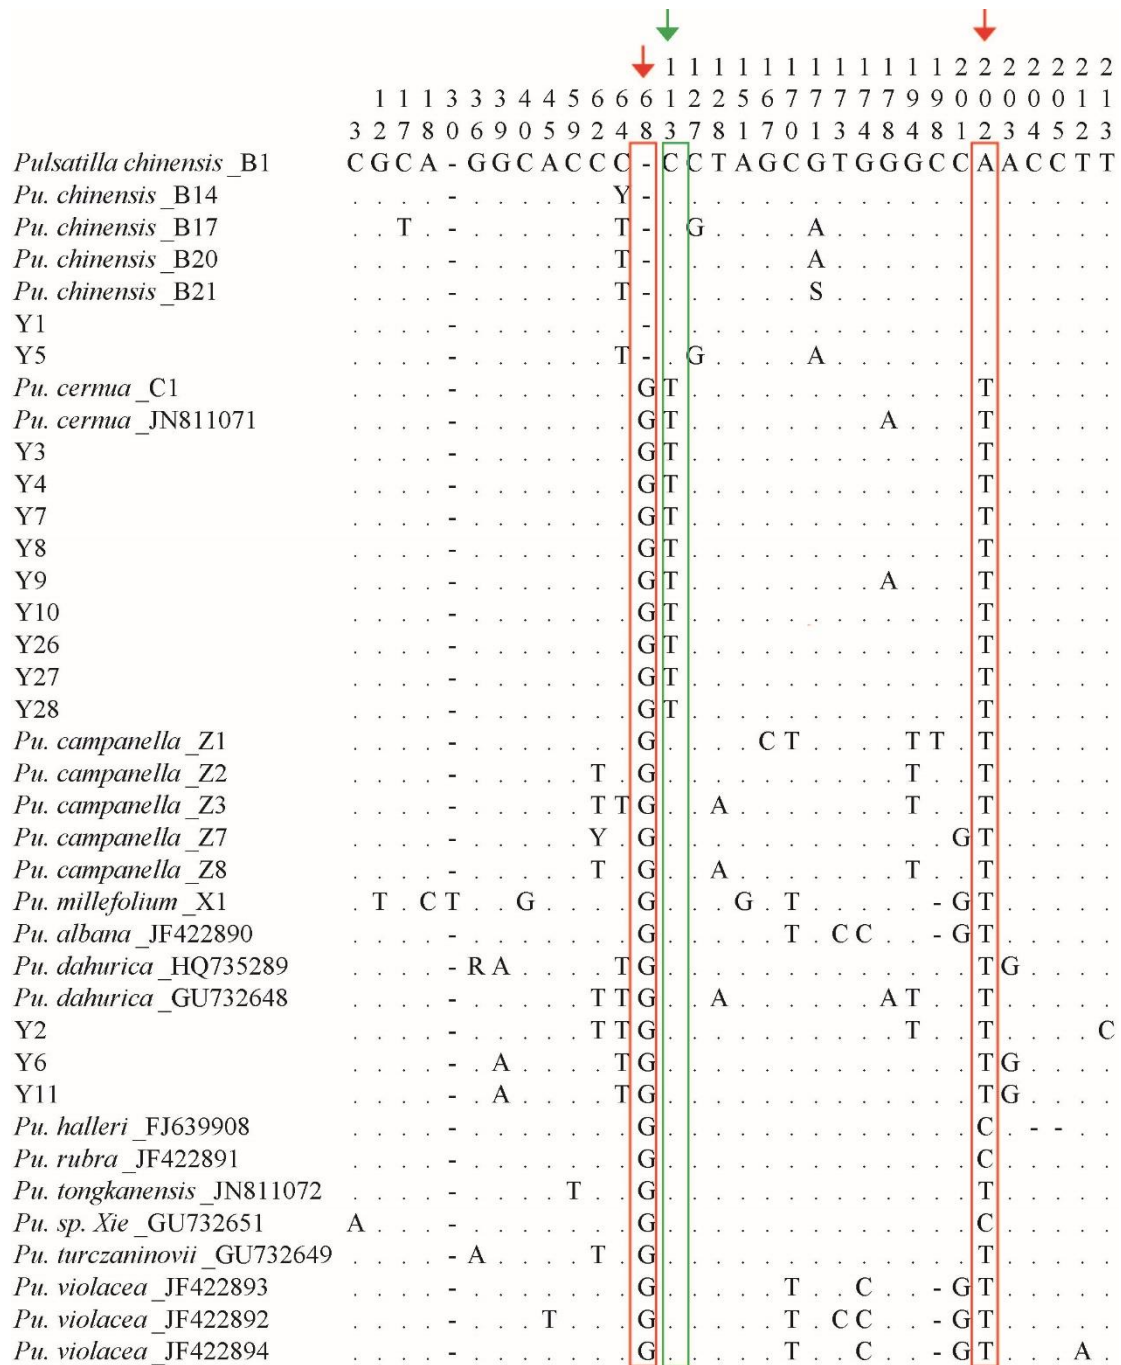

**Supplementary Figure S2** Sequence divergence among *Pulsatilla* species and fourteen commercial Baitouweng products in the ITS2 region. The number represents the positions of variable sites (bp); dots (.) represents the nucleotide identical to the first line; dash (-) represents a nucleotide indel; Y represents T/C; S represents C/G; R represents A/G. Red arrows and boxes indicate the specific SNP sites in *Pu. chinensis*; green arrow and box indicate the specific SNP sites in *Pu. crenua*.

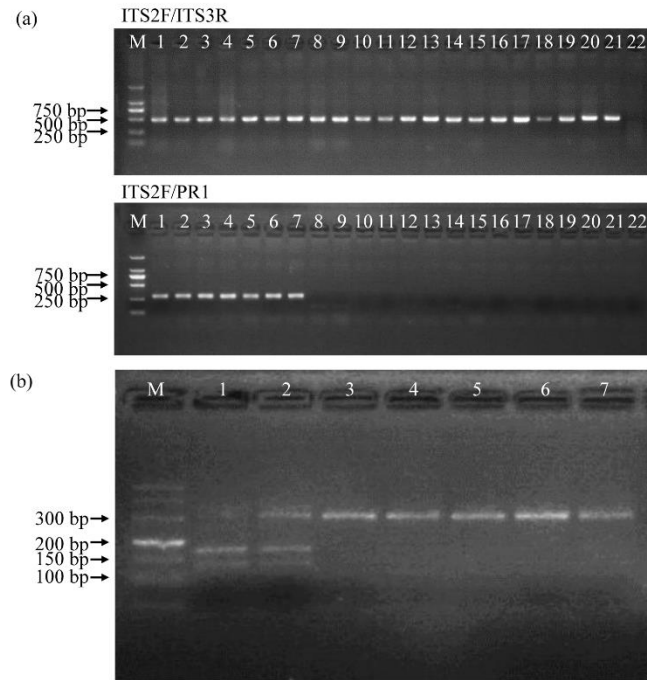

**Supplementary Figure S3** Full-length gels of Specific PCR-RFLP assay of *Pulsatilla chinensis* and its adulterants. (a) PCR products by primers ITS2F/ITS3R and ITS2F/PR1. Lane 1-22: *Pu. chinensis* (1-2), *Pu. cernua* (3-4), *Pu. campanella* (5-6), *Pu. millefolium* (7), *Anemone hupehensis* (8-9), *Cimicifuga simplex* (10-11), *Clematis armandii* (12-13), *Potentilla chinensis* (14-15), *Po. discolor* (16-17), *Rhaponticum uniflorum* (18-19), *Platycodon grandiflorus* (20-21) and water control (22). Lane M, DL2000 DNA marker. (b) *Bgl* I restriction digest pattern of PCR products of *Pulsatilla* species. Lane 1-7: *Pu. chinensis* (1-2), *Pu. cernua* (3-4), *Pu. campanella* (5-6) and *Pu. millefolium* (7). Lane M, DL500 DNA marker.
